# Supplementary material for: 3D porous nano/micro nickel sulfides with hierarchical structure: controlled synthesis, structure characterization and electrochemical properties
Source: Royal Society of Chemistry journal article supplement (doi:10.1039/c3dt00017f), 2013-01-01
Supplement: c3dt00017f.pdf [file c3dt00017f.pdf]

## Electronic Supplementary Information

3D porous nano/micro nickel sulfides with hierarchical structure: controlled synthesis, structure characterization and electrochemical properties

**Liwei Mi,<sup>\*a</sup> Qi Ding,<sup>a,b</sup> Weihua Chen,<sup>\*b</sup> Li Zhao<sup>a</sup>, Hongwei Hou,<sup>b</sup> Chuntai Liu,<sup>c</sup> Changyu Shen<sup>c</sup> and Zhi Zheng<sup>\*a</sup>**

<sup>a</sup> Key Laboratory for Micro-Nano Energy Storage and Conversion Materials of Henan Province, Institute of Surface Micro and Nano Materials, Xuchang University, Henan 461000, P. R. China. Fax: +86-374-2968784; Tel: +86-374-2968784; E-mail: [mlwzzu@163.com](mailto:mlwzzu@163.com) & [zzheng@xcu.edu.cn](mailto:zzheng@xcu.edu.cn)

<sup>b</sup> Department of Chemistry, Zhengzhou University, Henan 450001, P. R. China. E-mail: [chenweih@zzu.edu.cn](mailto:chenweih@zzu.edu.cn)

<sup>c</sup> National Engineering and Research Center for Advanced Polymer Processing Technology, Zhengzhou University, Henan 450001, P. R. China.

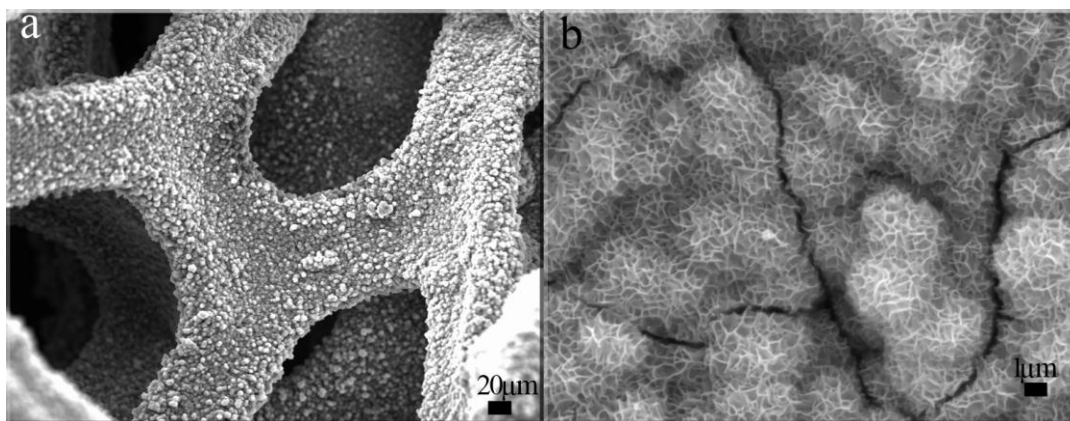

**Figure 1S** Characterization of sample 1: (a) overall view; (b) SEM micrographs of the flower-like nickel sulfide microspheres.

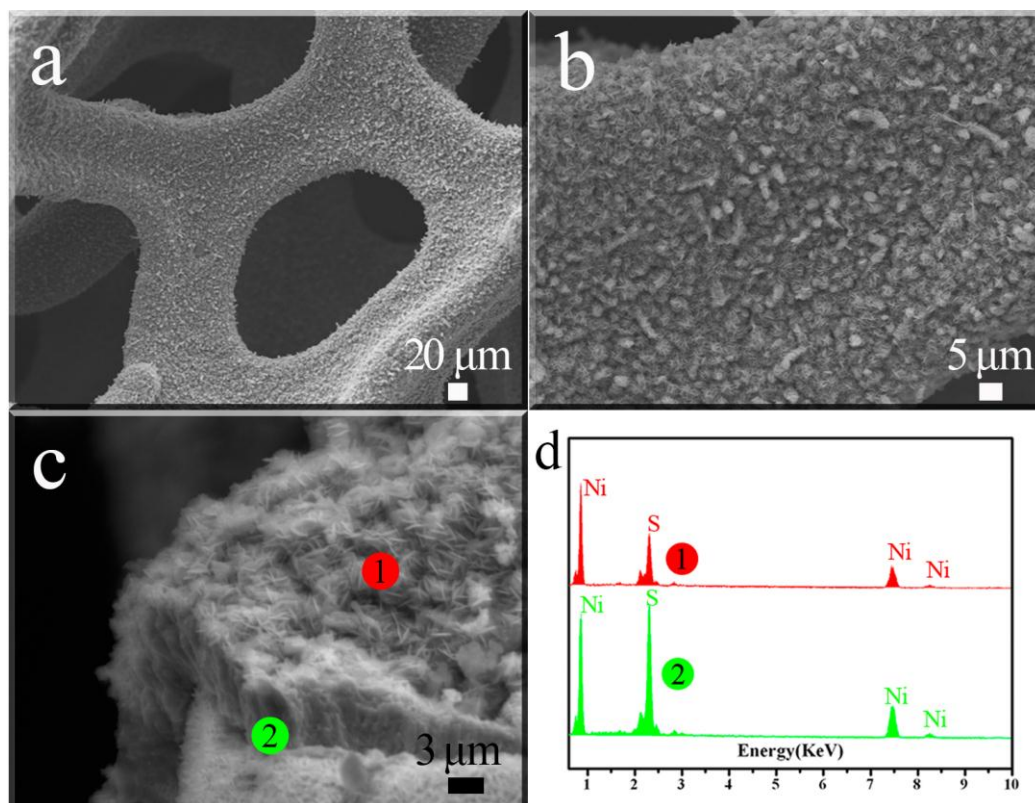

**Figure 2S** Characterization of sample 2: (a) overall view; (b) SEM micrographs of the flower-like nickel sulfide nanoplates; (c) cross-sectional view and (d) EDS spectra.

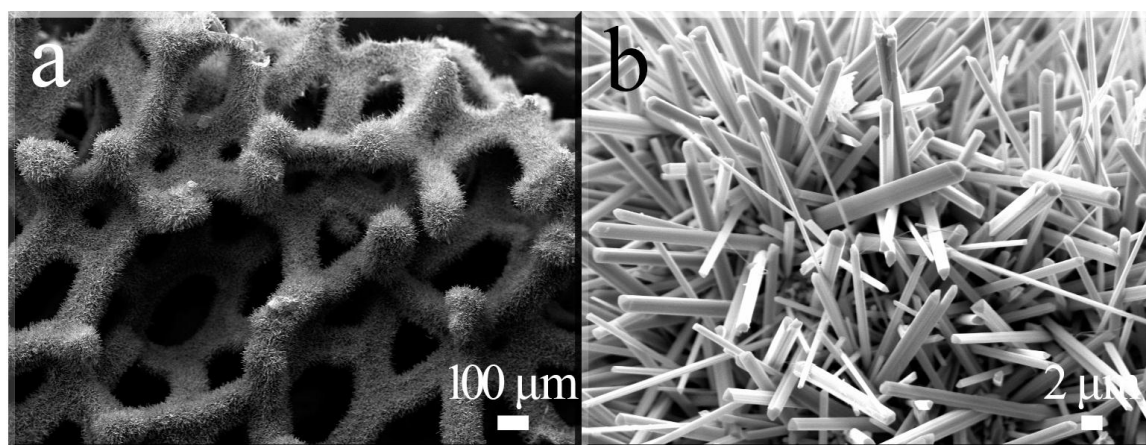

**Figure 3S** Characterization of sample **3**: (a) overall view; (b) SEM micrographs of the prism-like nickel sulfide microrods.

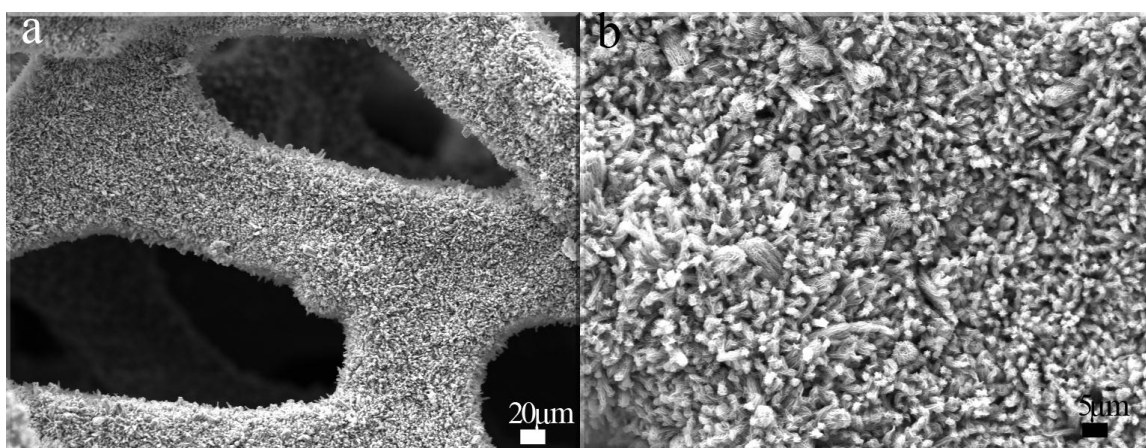

**Figure 4S** Characterization of sample **4**: (a) overall view; (b) SEM micrographs of the chain-like nickel sulfide nanoplates.

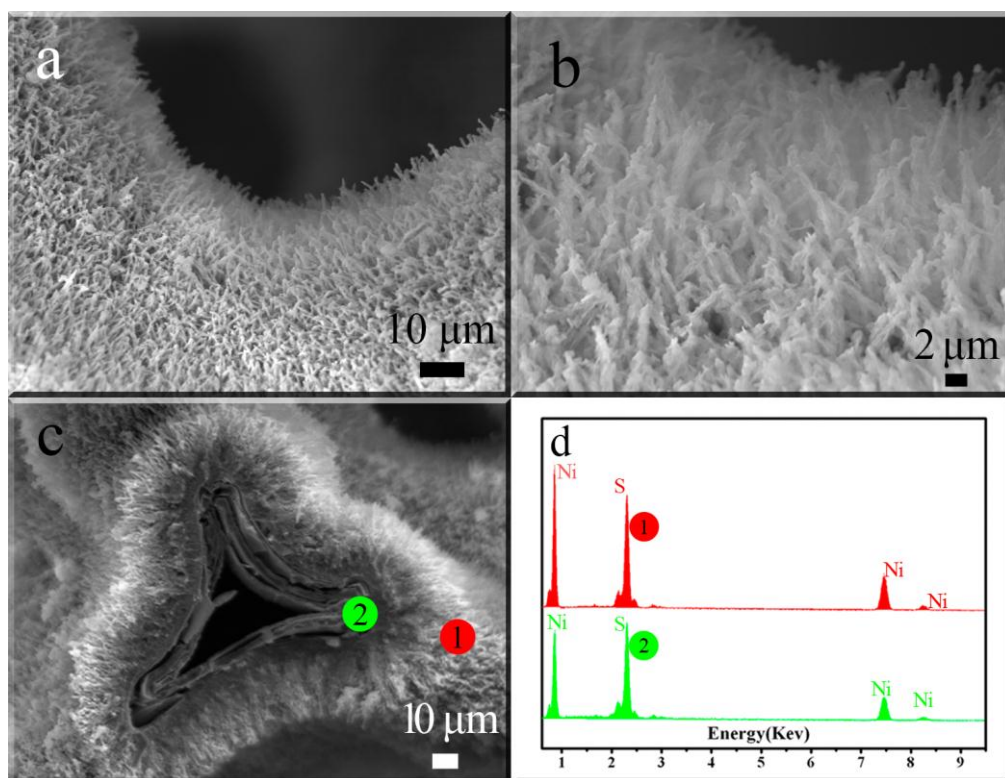

**Figure 5S** Characterization of sample **5**: (a) overall view; (b) SEM micrographs of the chain-like nickel sulfide nanoplates; (c) cross-sectional view and (d) EDS spectra.

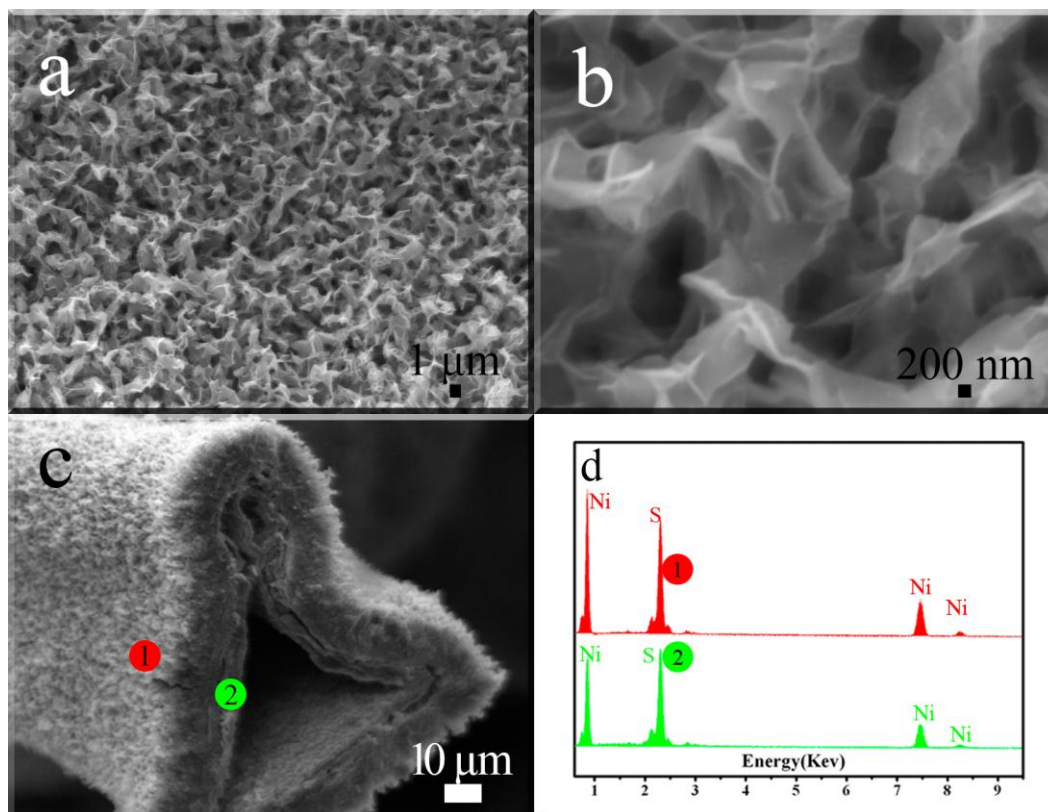

**Figure 6S** Characterization of sample **6**: (a) overall view; (b) SEM micrographs of the chain-like nickel sulfide nanoplates; (c) cross-sectional view and (d) EDS spectra.
